# Supplementary material for: Development and validation of UV chromatographic method for quantification of copper and copper nanoparticles in different matrices and pharmaceutical products
Source: PeerJ journal article supplement (doi:10.7717/peerj-achem.14), 2022-03-01
Supplement: copper.xlsx [file copper.xlsx]

## Sheet: Cu std LD& LQ Tab 1 
SUMMARY OUTPUT
Regression Statistics
Multiple R	0.999999
R Square	0.999999
Adjusted R Square	0.999998
Standard Error	0.659521
Observations	10
										stdv	0.829139
ANOVA										lq	0.114883
	df	SS	MS	F	Significance F					ld	0.0379115
Regression	1	2.47786e+06	2.47786e+06	5.69664e+06	1.0635e-24
Residual	8	3.47975	0.434968
Total	9	2.47786e+06
	Coefficients	Standard Error	t Stat	P-value	Lower 95%	Upper 95%	Lower 95.0%	Upper 95.0%
Intercept	-0.142634	0.262197	-0.543995	0.601273	-0.747261	0.461993	-0.747261	0.461993
X Variable 1	72.1723	0.0302386	2386.76	1.0635e-24	72.1026	72.2421	72.1026	72.2421
RESIDUAL OUTPUT
Observation	Predicted Y	Residuals	Standard Residuals
1	3.46598	0.0740168	0.119036
2	7.0746	0.0254	0.0408489
3	14.2918	-0.0918338	-0.14769
4	28.7263	0.0736987	0.118524
5	57.5952	0.00476369	0.00766109
6	72.0297	0.100296	0.161299
7	360.719	-0.0890539	-0.143219
8	721.581	0.539258	0.86725
9	1082.44	-1.53243	-2.46449
10	1443.3	0.895883	1.44078

## Sheet:  Cu Muscle LD& LQ Tab 1
SUMMARY OUTPUT
Regression Statistics
Multiple R	0.999902
R Square	0.999804
Adjusted R Square	0.999776
Standard Error	0.195131
Observations	9									stdv	0.516269
										ld	0.0226183
ANOVA										Lq	0.0685403
	df	SS	MS	F	Significance F
Regression	1	1361.67	1361.67	35761.6	3.05177e-14
Residual	7	0.266533	0.0380762
Total	8	1361.93
	Coefficients	Standard Error	t Stat	P-value	Lower 95%	Upper 95%	Lower 95.0%	Upper 95.0%
Intercept	0.0594111	0.17209	0.345234	0.74006	-0.347516	0.466338	-0.347516	0.466338
X Variable 1	75.3233	0.39831	189.107	3.05177e-14	74.3815	76.2652	74.3815	76.2652
RESIDUAL OUTPUT
Observation	Predicted Y	Residuals	Standard Residuals
1	15.1241	0.0759222	0.415947
2	15.1241	0.0159222	0.0872314
3	15.1241	-0.254078	-1.39199
4	30.1887	0.344256	1.88604
5	30.1887	0.0912556	0.499952
6	30.1887	-0.111044	-0.608367
7	45.2534	0.0825889	0.452471
8	45.2534	-0.0224111	-0.122781
9	45.2534	-0.222411	-1.2185

## Sheet: DL&QL liver Tab 1
SUMMARY OUTPUT
Regression Statistics
Multiple R	0.999998
R Square	0.999995
Adjusted R Square	0.999995
Standard Error	0.959112
Observations	8									stdv	1.21343
										ld	0.0546571
ANOVA										LQ	0.165628
	df	SS	MS	F	Significance F
Regression	1	1.17986e+06	1.17986e+06	1.2826e+06	3.19906e-17
Residual	6	5.51937	0.919896
Total	7	1.17987e+06
	Coefficients	Standard Error	t Stat	P-value	Lower 95%	Upper 95%	Lower 95.0%	Upper 95.0%
Intercept	0.374198	0.429013	0.872229	0.416618	-0.67556	1.42396	-0.67556	1.42396
X Variable 1	73.2627	0.06469	1132.52	3.19906e-17	73.1044	73.421	73.1044	73.421
RESIDUAL OUTPUT
Observation	Predicted Y	Residuals	Standard Residuals
1	7.70047	-0.400467	-0.450994
2	15.0267	-0.205737	-0.231695
3	29.6793	-0.646276	-0.727817
4	58.9844	-0.762354	-0.858541
5	73.6369	1.01311	1.14093
6	366.688	1.73452	1.95337
7	733.001	-0.451157	-0.50808
8	1099.31	-0.281637	-0.317171

## Sheet: Recovery, Accuracy, Precision
						intra	inter
	conc	area	act.conc	recovery		72.111	72.55		0.507065
	0.05	3.54	0.0505066	101.013		72.533	72.9113		0.762506								QC of Liver
	0.1	7.1	0.0998489	99.8489		72.723	73.113		0.441437								conc	area
	0.2	14.2	0.198256	99.1282		73.044	74.0667		1.05196								1	73.0633
	0.4	28.8	0.400615	100.154		73.172	73.777		1.88254								1	73.747
	0.8	57.6	0.799789	99.9737		73.544	72.0134		0.5269								1	73.532
	1	72.13	1.00118	100.118	mean	72.8545	73.0719		0.8599								2	134.003
	5	360.63	4.99985	99.997	sd	0.507065	0.762506		2.31706								2	133.574
	10	722.12	10.0102	100.102	rsd	0.695997	1.0435		0.455747								2	133.765
	15	1080.91	14.9831	99.8872	mean	100.031		mean	0.978346								3.5	219.768
	20	1444.2	20.0184	100.092	sd	0.455747											3.5	220.332
nano Cu	3.3	238.026	3.30053	100.016	Accuracy												3.5	219.036
	conc	area	act.amount	rec.			intra	inter										intra	inter
	0.05	3.81	0.0513708	102.742			75.711	76.902	1.02175		conc	area	act amount	rec	conc	area		amount
	0.1	7.9	0.10567	105.67			75.514	77.337	1.02753		0.1	7.3	0.104749	104.749	1	74.33	74.44	1.01967	1.02117
	0.2	15.2	0.202586	101.293			76.0443	76.5267	1.01677		0.2	14.821	0.207406	103.703	1	74.65	73.901	1.02404	1.01382
	0.4	30.53	0.40611	101.527	QC Of Muscle		76.2912	78.2123	1.03915		0.4	29.033	0.401392	100.348	1	74.107	73.299	1.01663	1.0056
	0.8	62.4	0.829221	103.653	conc	area	75.371	78.434	1.04209		0.8	58.222	0.799806	99.9758	1	73.873	73.059	1.01343	1.00232
	1	75.73	1.00619	100.619	0.2	15.2	75.093	75.6417	1.00502		1	74.65	1.02404	102.404	1	73.922	74.252	1.0141	1.01861
	5	370.52	4.91987	98.3974	0.2	15.14	75.6707	77.1756	mean		5	368.422	5.03387	100.677	1	74.811	74.6105	1.02624	1.0235
	10	742.63	9.86006	98.6006	0.2	14.87	0.441437	1.05196	sd		10	732.55	10.004	100.04		74.2822	mean	1.01902	1.01417
	15	1156.44	15.3539	102.359	0.4	30.533	0.583366	1.36308	rsd		15	1099.03	15.0063	100.042		0.386025	sd	0.00526902	0.00859905
			mean	101.651	0.4	30.28							mean	101.492		0.00519673	rsd%	0.517069	0.84789
			sd	2.31706	0.4	30.0777							sd	1.88254
			Accuracy		0.6	45.336							Acc				73.9269
					0.6	45.231											0.629992
					0.6	45.031											0.00852182

## Sheet: std addition Tab 3
50ng/ml	conc	area	actual	recovery			reco.mean		conc.	area	actual	recovery			rec. mean
3.54	5	364.17	5.04891	100.978	mean	5.04522	100.904		0.5	39.57	0.54989	109.978	mean	0.549659	109.932
360.63	5	364.09	5.0478	100.956	sd	0.00546966			0.5	39.12	0.543653	108.731	sd	0.00589398
	5	363.45	5.03893	100.779	rsd	0.108413			0.5	39.97	0.555434	111.087	rsd	1.0723
	10	725.12	10.0518	100.518	mean	10.0608	100.608		1	76.13	1.05662	105.662	mean	1.05422	105.422
	10	725.94	10.0631	100.631	sd	0.00814968			1	75.81	1.05218	105.218	sd	0.00224061
	10	726.26	10.0676	100.676	rsd	0.0810042			1	75.93	1.05385	105.385	rsd	0.212538
	15	1083.91	15.0247	100.164	mean	15.0382	100.255		1.5	111.59	1.5481	103.207	mean	1.55061	103.374
	15	1086.49	15.0604	100.403	sd	0.0193666			1.5	111.82	1.55129	103.419	sd	0.00224181
	15	1084.27	15.0296	100.198	rsd	0.128783			1.5	111.902	1.55243	103.495	rsd	0.144577
				100.589	0.296806							106.242
	conc	area	actual	recovery			reco.mean					2.96789
	5	365.35	5.06527	101.305	mean	5.05409	101.082
	5	364.39	5.05196	101.039	sd	0.010284
	5	363.89	5.04503	100.901	rsd	0.203479
	10	725.12	10.0518	100.518	mean	10.0506	100.506
	10	724.94	10.0493	100.493	sd	0.00127031
	10	725.06	10.0509	100.509	rsd	0.0126391
	15	1085.91	15.0524	100.349	mean	15.0495	100.33
	15	1085.69	15.0493	100.329	sd	0.00284388
	15	1085.5	15.0467	100.311	rsd	0.0188969
				100.639
				0.355891

## Sheet: DL& QL Serum Tab 1
SUMMARY OUTPUT
Regression Statistics
Multiple R	0.999997
R Square	0.999994
Adjusted R Square	0.999993
Standard Error	1.07499
Observations	8
ANOVA
	df	SS	MS	F	Significance F
Regression	1	1.17961e+06	1.17961e+06	1.02078e+06	6.34605e-17
Residual	6	6.93363	1.1556								stdv	1.36004
Total	7	1.17962e+06									ld	0.0612671
											lq	0.185658
	Coefficients	Standard Error	t Stat	P-value	Lower 95%	Upper 95%	Lower 95.0%	Upper 95.0%
Intercept	-0.10236	0.480846	-0.212876	0.838472	-1.27895	1.07423	-1.27895	1.07423
X Variable 1	73.2551	0.0725057	1010.34	6.34605e-17	73.0777	73.4325	73.0777	73.4325
RESIDUAL OUTPUT
Observation	Predicted Y	Residuals	Standard Residuals
1	7.22315	-0.0031476	-0.00316263
2	14.5487	-0.327656	-0.32922
3	29.1997	-0.966671	-0.971287
4	58.5017	-0.679703	-0.682949
5	73.1527	0.497281	0.499655
6	366.173	2.16916	2.17952
7	732.448	0.00156565	0.00157313
8	1098.72	-0.690832	-0.69413

## Sheet:  Serum std Tab 1
		area		conc	area	act.conc	Recovery	robustness
		7.3		0.1	7.22	0.100336	100.336	72.111
		14.821		0.2	14.221	0.195934	97.9668	72.533
		29.033		0.4	28.233	0.387265	96.8164	72.723
		58.222		0.8	57.822	0.791299	98.9124	73.044
		74.65		1	73.65	1.00743	100.743	73.172
		368.422		5	368.342	5.03141	100.628	73.544
		732.55		10	732.45	10.0032	100.032	72.55
		1099.03		15	1098.03	14.9952	99.9682	72.9113
						mean	99.4254	73.113
		intra	inter			sd	1.40775	74.0667
		72.111	72.9113			Accuracy	1.41588	73.777
		72.533	73.113					72.0134
		72.723	74.0667					74.711
		73.044	73.777				mean	73.0976
		73.172	72.0134				sd	0.772132
		73.544	74.711				pooledRSD	1.0563
	mean	72.8545	73.4321
	sd	0.462885	0.870156
	rsd	0.635355	1.18498
